# Supplementary material for: Cholesterol-lowering effect of bile salt hydrolase from aLactobacillus johnsoniistrain mediated by FXR pathway regulation
Source: Royal Society of Chemistry journal article supplement (doi:10.1039/d1fo03143k), 2021-12-03
Supplement: d1fo03143k5.pdf [file d1fo03143k5.pdf]

1 Supplemental Table 1 PCR and quantitative PCR primers used in this study

| Primer      | Forward primer (5'-3')           | Reverse primer (5'-3')           | Reference  |
|-------------|----------------------------------|----------------------------------|------------|
| <b>PCR</b>  |                                  |                                  |            |
| 411-BSH     | CATGCCATGGGAATGTGTACTGGTTAAGATTC | CGGCTCGAGCTAGTAAGTCACAAGACTGGTTG | This study |
| 338F/806R   | ACTCCTACGGGA-GGCAGCAG            | GGACTACHVGGGTWTCTAAT             |            |
| <b>qPCR</b> |                                  |                                  |            |
| CYP7A1      | ACAGAAGCATAGACCCAA               | TGCCAAACAGCGTTAGAT               | 13         |
| CYP8B1      | AAGGCTGGCTTCTGAGCTT              | AACAGCTCATCGGCCTCATC             |            |
| CYP27A1     | TGCCTGGGTCGGAGGAT                | GAGCCAGGGCAATCTCATACTT           | 18         |
| CYP7B1      | TAGCCCTCTTCTCCACTCATA            | GAACCGATCGAACCTAAATTCCT          |            |
| FXR         | ACATCCCCATCTCTCTGCAC             | TGTGAGGGCTGCAAAGGTTT             |            |
| SHP         | CCTGGAGTCTTCTGGAGCCTTGA          | TGTTGCAGGTGTGCGATGTGG            |            |
| FGFR4       | GCATCTTTCAGGGGACACCA             | TTGTACCAGTGACGACCACG             | 19         |
| KLB         | TCAGGCCTGCATAGGAAATG             | CTGGATCGGGAGACTTAGGA             | 20         |
| LRH-1       | TTGAGTGGGCCAGGAGTAGT             | ACGCGACTTCTGTGTGTGAG             |            |
| FGF15       | ACGTCCTTGATGGCAATCG              | GAGGACCAAACGAACGAAATT            |            |
| IBABP       | CAGGAGACGTGATTGAAAGGG            | GCCCCAGAGTAAGACTGGG              |            |
| ABCG5       | GCAGGGACCGAATTGTGATTG            | AGGGATTGGAATGTTTCAGGACAG         |            |
| ABCG8       | GGCTCAGGATCGGCTTTCAC             | CCTTGACACAGGCATGAAGCA            | 21         |
| HMGCR       | GGACCAACCTTCTACCTC               | CCATCACAGTGCCACATAC              |            |
| LDL-R       | CAGTCCCAGGCAGCGTAT               | TTGATCTTGGCGGGTGT                |            |
| rpL32       | TCTGGTCCACAACGTCAAGG             | GGATTGGTGACTCTGATGGC             |            |

### 3 Supplemental Table 2 Primer sequence for *bsh* qPCR

| Group Expected <sup>23</sup> | Primer sequence (5'-3')  | F/R | Reference <i>bsh</i><br>(Accession number)*                                       | Product size<br>(bp) |
|------------------------------|--------------------------|-----|-----------------------------------------------------------------------------------|----------------------|
| 2                            | TGTGTGAGCAACGAGATGGC     | F   | AAR39435, BAF39637, AAF67801, AAN24611,<br>CDB23390, BAQ98062, BAP83517, AAX86039 | 105                  |
|                              | ACACGAACGAAACGCGACGG     | R   |                                                                                   |                      |
| 3A                           | AYTTTGGHMGWAAYYTHGAY     | F   | AAR39435, BAF39637, AAF67801, AAN24611,<br>CDB23390, BAQ98062, BAP83517, AAX86039 | 105                  |
|                              | RTTNARDCCDGCHATVCCWAVHCC | R   |                                                                                   |                      |
| 3D                           | GAGGATGGACTAGGAATGGC     | F   | ABE00605, CDK34338                                                                | 104                  |
|                              | TGGAATAAACTCGAACGGCG     | R   |                                                                                   |                      |

4 \*Accession number of the reference *bsh* is from EMBL database (<http://www.ebi.ac.uk/>)

5

6

7 **Supplemental Figure legend:**

8 **Figure S1:** Physiological and biochemical indexes (serum lipid: **A**; and liver lipid: **B**) were used to  
9 evaluate the fat-reducing function of BSH strain in these five groups (ND: normal diet; HFD: high-fat  
10 diet; HFD+NB5462: high-fat diet + empty plasmid control NB5462; HFD+YB334-H: high-fat diet +  
11 recombinant YB334 with high BSH activity; and HFD+YB334-L: high-fat diet + recombinant YB334  
12 with low BSH activity). TC: total cholesterol; TG: triacylglycerols; LDL-C: low-density lipoprotein  
13 cholesterol; and HDL-C: high-density lipoprotein cholesterol. Values were expressed as mean  $\pm$  SD (n  
14 = 8). \* Represents a significant ( $p < 0.01$ ) difference from HFD+NB5462 group. \*\* Represents a  
15 significant ( $p < 0.0001$ ) difference from HFD+NB5462 group. #  $p < 0.01$ , ##  $p < 0.0001$ .

16  
17 **Figure S2:** Fecal bile acid levels were used to evaluate the pathway of BSH involved in bile acid  
18 metabolism in these five groups (ND: normal diet; HFD: high-fat diet; HFD+NB5462: high-fat diet +  
19 empty plasmid control NB5462; HFD+YB334-H: high-fat diet + recombinant YB334 with high BSH  
20 activity; and HFD+YB334-L: high-fat diet + recombinant YB334 with low BSH activity). UDCA:  
21 ursodeoxycholic acid;  $\alpha$ - $\beta$ - $\omega$ -MCA:  $\alpha$ - $\beta$ - $\omega$ -muricholic acid; CA: cholic acid; CDCA:  
22 chenodeoxycholic acid; DCA: deoxycholic acid; LCA: lithocolic acid; TUDCA: tauroursodeoxycholic  
23 acid; T $\alpha$ ( $\beta$ / $\omega$ )MCA: tauro- $\alpha$ ( $\beta$ / $\omega$ )-muricholic acid; TCA: taurocholic acid; TCDCA:  
24 taurochenodeoxycholic acid; TDCA: taurodeoxycholic acid; TLCA: tauroolithocolic acid. Values were  
25 expressed as mean  $\pm$  SD (n = 8). \* ( $p < 0.01$ ) and \*\* ( $p < 0.0001$ ) represent a significant difference  
26 from HFD+NB5462 group, respectively.

27  
28 **Figure S3:** Alpha diversity (**A**), Bacteria composition (phylum level, **B**), and Heatmap clustering  
29 analysis of biodiversity (**C**) of mouse gut microbiota in these four groups (HFD+NB5462: high-fat diet  
30 + empty plasmid control NB5462; HFD: high-fat diet; HFD+YB334-H: high-fat diet + recombinant  
31 YB334 with high BSH activity; ND: normal diet).

32  
33 **Figure S4:** Cecum short-chain fatty acids (SCFAs) were detected to verify the relationship between  
34 intestinal flora and fat metabolism. HFD+NB5462: high-fat diet + empty plasmid control NB5462;  
35 HFD: high-fat diet; HFD+YB334-H: high-fat diet + recombinant YB334 with high BSH activity; ND:  
36 normal diet. Values were expressed as mean  $\pm$  SD (n = 8). \*\* Represents a significant ( $p < 0.0001$ )  
37 difference from HFD+NB5462 group.

38

39

A. Serum lipid

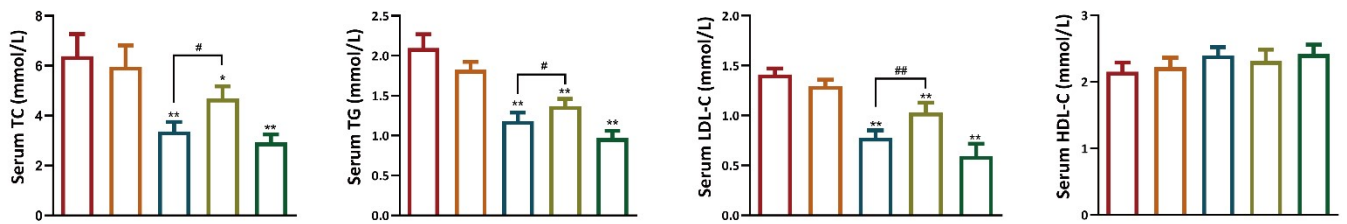

B. Liver lipid

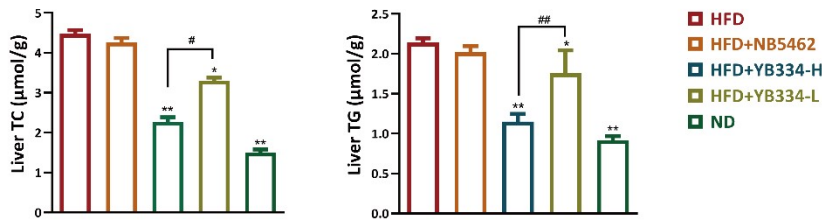

40

41 **Fig. S1:** Physiological and biochemical indexes (serum lipid: **A**; and liver lipid: **B**) were used to evaluate  
 42 the fat-reducing function of BSH strain in these five groups (ND: normal diet; HFD: high-fat diet;  
 43 HFD+NB5462: high-fat diet + empty plasmid control NB5462; HFD+YB334-H: high-fat diet +  
 44 recombinant YB334 with high BSH activity; and HFD+YB334-L: high-fat diet + recombinant YB334 with  
 45 low BSH activity). TC: total cholesterol; TG: triacylglycerols; LDL-C: low-density lipoprotein cholesterol;  
 46 and HDL-C: high-density lipoprotein cholesterol. Values were expressed as mean  $\pm$  SD (n = 8). \*  
 47 Represents a significant ( $p < 0.01$ ) difference from HFD+NB5462 group. \*\* Represents a significant ( $p$   
 48  $< 0.0001$ ) difference from HFD+NB5462 group. #  $p < 0.01$ , ##  $p < 0.0001$ .

49

50

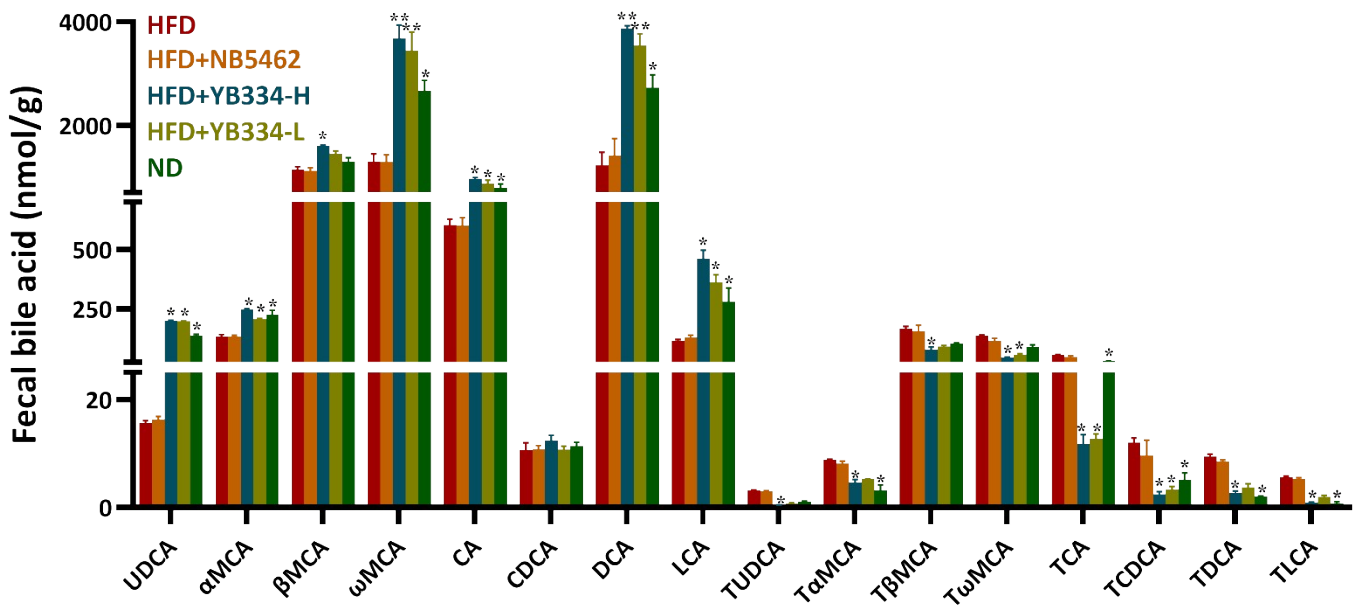

51

52 **Fig. S2:** Fecal bile acid levels were used to evaluate the pathway of BSH involved in bile acid metabolism  
 53 in these five groups (ND: normal diet; HFD: high-fat diet; HFD+NB5462: high-fat diet + empty plasmid  
 54 control NB5462; HFD+YB334-H: high-fat diet + recombinant YB334 with high BSH activity; and  
 55 HFD+YB334-L: high-fat diet + recombinant YB334 with low BSH activity). UDCA: ursodeoxycholic acid;  
 56  $\alpha$ -/ $\beta$ -/ $\omega$ -MCA:  $\alpha$ -/ $\beta$ -/ $\omega$ -muricholic acid; CA: cholic acid; CDCA: chenodeoxycholic acid; DCA:  
 57 deoxycholic acid; LCA: lithocolic acid; TUDCA: tauroursodeoxycholic acid; T $\alpha$ ( $\beta$ / $\omega$ )MCA: tauro- $\alpha$ ( $\beta$ / $\omega$ )-  
 58 muricholic acid; TCA: taurocholic acid; TCDC: taurochenodeoxycholic acid; TDCA: taurodeoxycholic  
 59 acid; TLCA: tauroolithocolic acid. Values were expressed as mean  $\pm$  SD (n = 8). \* ( $p < 0.01$ ) and \*\* ( $p <$   
 60 0.0001) represent a significant difference from HFD+NB5462 group, respectively.

61

62

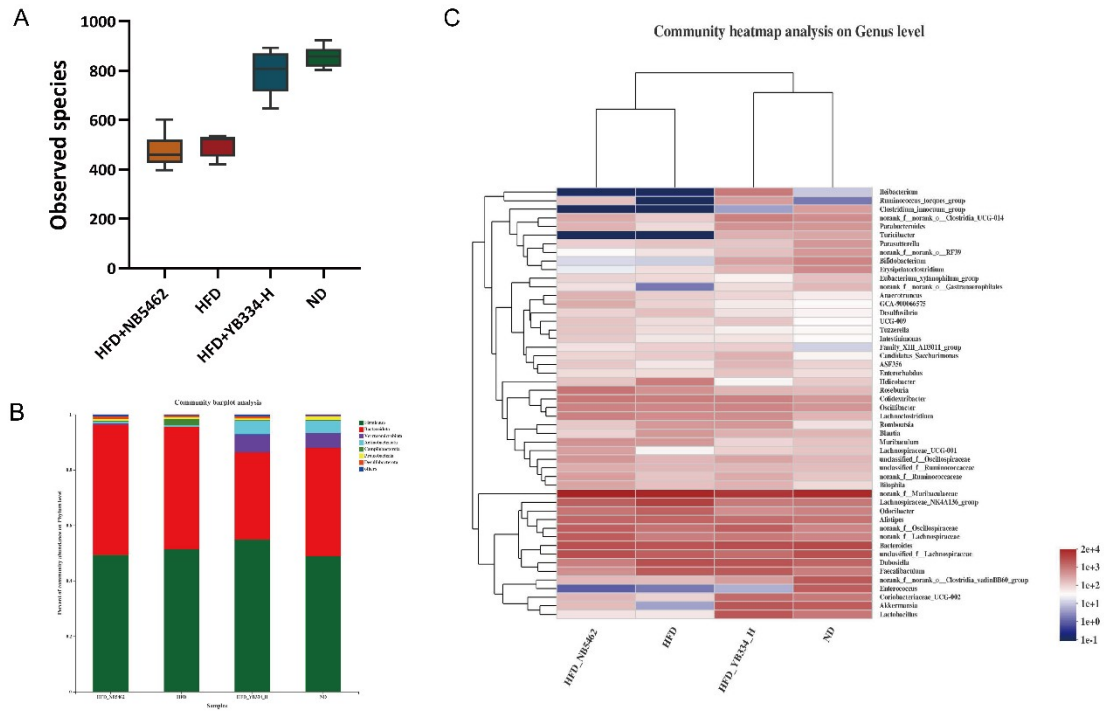

63

64 **Fig. S3:** Alpha diversity (A), Bacteria composition (phylum level, B), and Heatmap clustering analysis of  
 65 biodiversity (C) of mouse gut microbiota in these four groups (HFD+NB5462: high-fat diet + empty  
 66 plasmid control NB5462; HFD: high-fat diet; HFD+YB334-H: high-fat diet + recombinant YB334 with  
 67 high BSH activity; ND: normal diet).

68

69

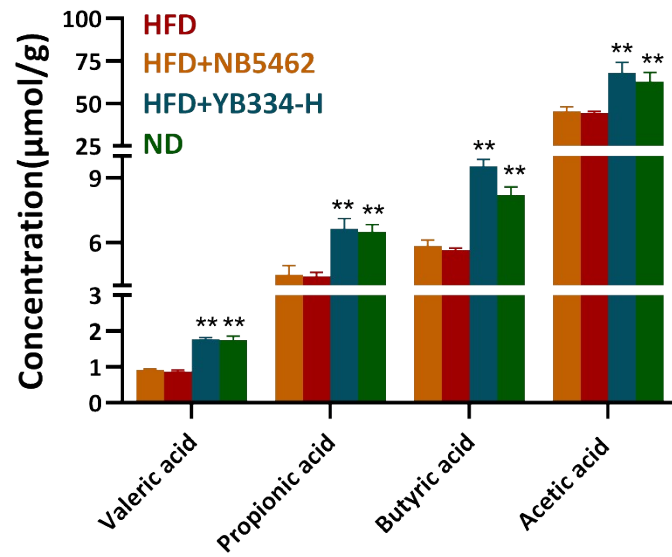

70

71 **Fig. S4:** Cecum short-chain fatty acids (SCFAs) were detected to verify the relationship between  
 72 intestinal flora and fat metabolism. HFD+NB5462: high-fat diet + empty plasmid control NB5462; HFD:  
 73 high-fat diet; HFD+YB334-H: high-fat diet + recombinant YB334 with high BSH activity; ND: normal diet.  
 74 Values were expressed as mean  $\pm$  SD (n = 8). \*\* Represents a significant ( $p < 0.0001$ ) difference from  
 75 HFD+NB5462 group.

76
