# Supplementary figures and images for: Cholesterol-lowering effect of bile salt hydrolase from aLactobacillus johnsoniistrain mediated by FXR pathway regulation
Source: Royal Society of Chemistry journal article supplement (doi:10.1039/d1fo03143k), 2021-12-03

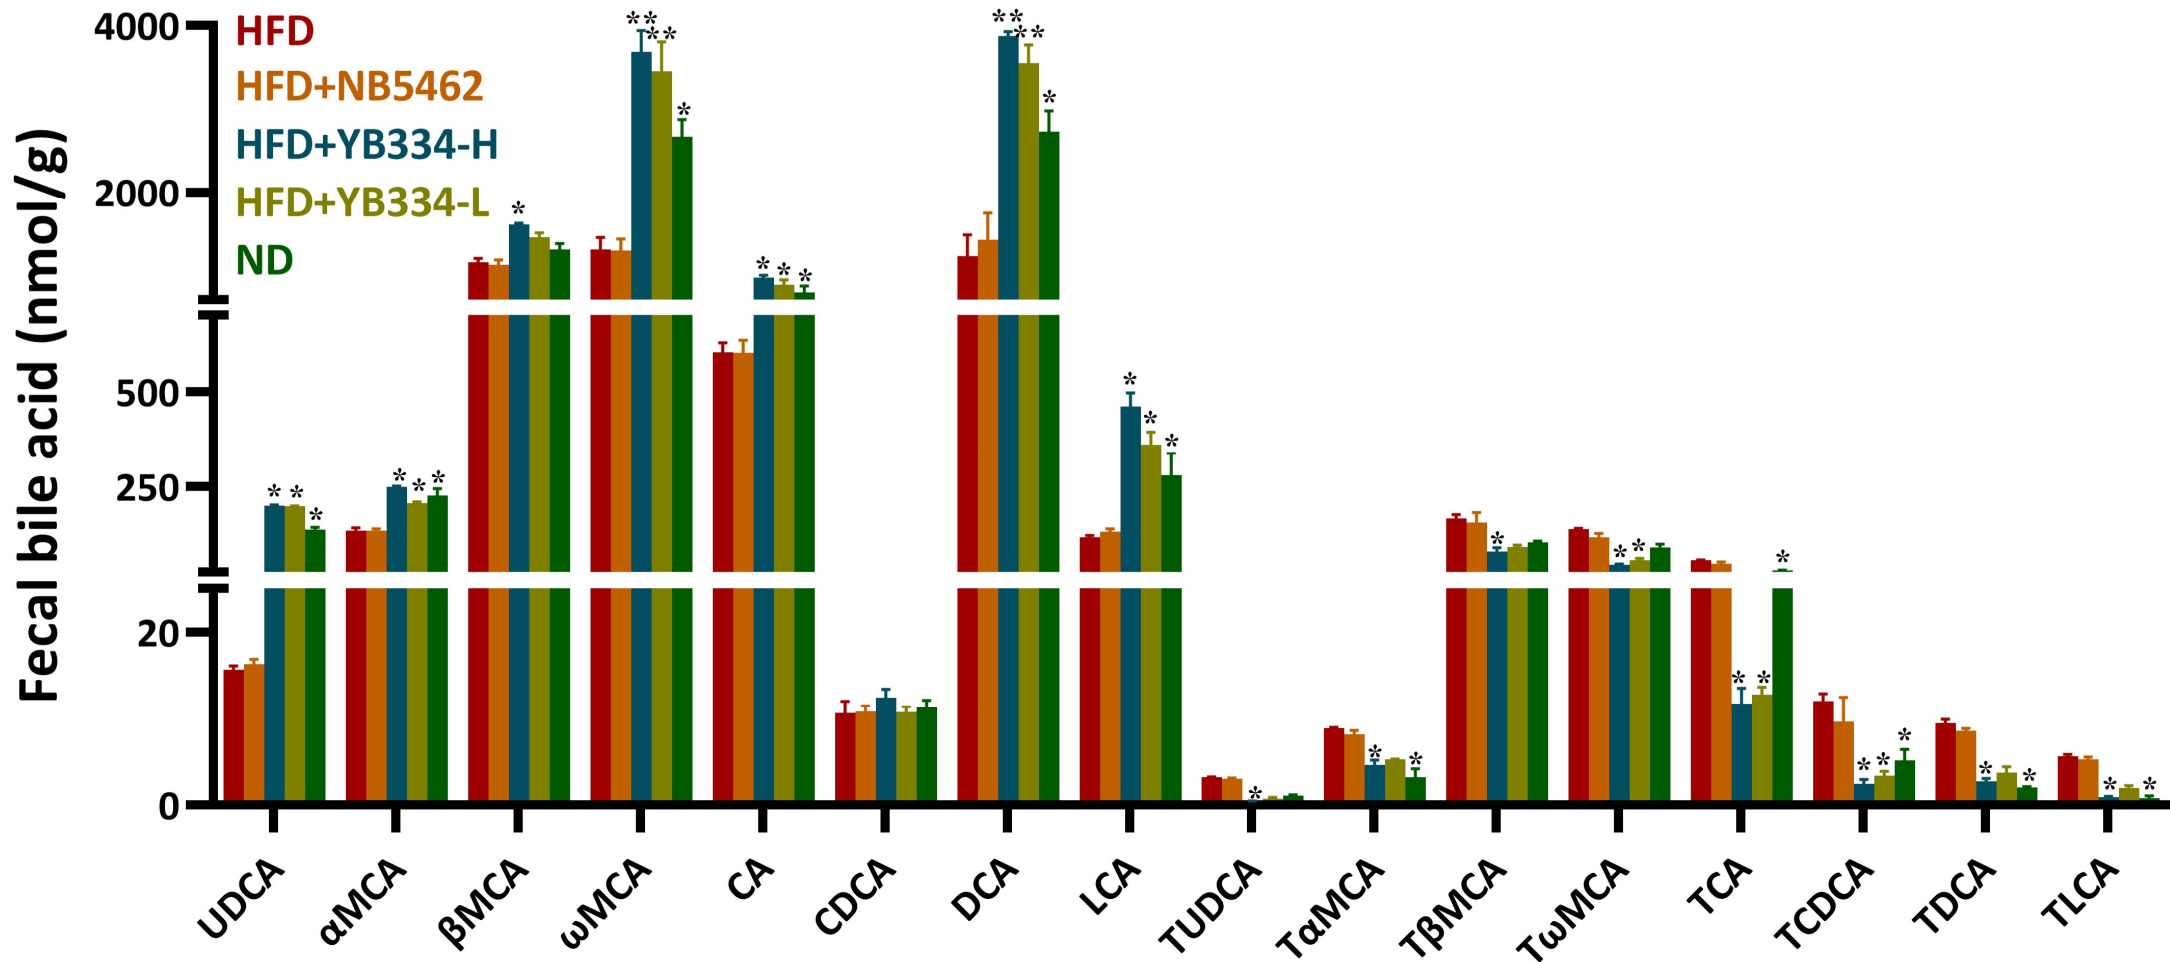

Supplement: d1fo03143k2.pdf [file d1fo03143k2.pdf]
